*In Reply:*

We appreciate Manning *et al.*'s comments about our article<sup>1</sup> and the issues surrounding withholding of Angiotensin Converting Enzyme Inhibitors (ACEis) and Angiotensin II Receptor Blockers (ARBs) before noncardiac surgery. We agree that large, international, randomized trials are required to optimally inform the effects of medications in the perioperative period; however, we do not agree that there is a compelling reason to conduct separate trials for ACEi and ARB medications in the surgical setting. The authors suggest that, based on some differences in their mechanisms of action, the withholding of these medications before surgery may produce different effects on major outcomes and should be considered separately. The Vascular events In noncardiac Surgery patients cOhort evaluation (VISION) Study did not differentiate between ACEi and ARB medications and cannot inform whether there was a difference in effect between these drugs.

In general cardiology, the issue of whether the differences in mechanisms of action of ACEi and ARB medications results in differential clinical effects has been explored. The Ongoing Telmisartan Alone and in Combination with Ramipril Global Endpoint Trial (ONTARGET) randomized 8,576 patients to receive ramipril (an ACEi) 10 mg per day and 8,542 patients to receive telmisartan (an ARB) 80 mg per day and followed patients for a median of 56 months.<sup>2</sup> The primary composite outcome (a composite of cardiovascular death, myocardial infarction, stroke, or hospitalization for heart failure) occurred in 1,412 patients (16.5%) assigned ramipril and 1,423 patients (16.7%) assigned telmisartan (relative risk, 1.01; 95% CI, 0.94 to 1.09). Moreover, there was no difference across the treatment groups in any of the individual components of the composite outcome.

The authors suggest that perioperative discontinuation of ACEi or ARB medications may potentially cause rebound hypertension and that this, too, may differ between these drug classes. A trial of 526 patients randomized to withhold or continue their ACEi or ARB before noncardiac surgery (approximately half of the patients were taking an ACEi and the other half an ARB) demonstrated that the withholding of these medications did not increase preoperative or postoperative hypertension.<sup>3</sup> Although there were no separate analyses for ACEi and ARBs, we would expect at least some trend toward an increased risk of hypertension if the discontinuation of either medication produced this effect.

The authors suggest that the duration for which patients have been taking an ACEi before surgery also may modify the effect of preoperative withholding because of the angiotensin escape phenomenon. We did not collect data regarding the duration of preoperative ACEi therapy; however, the escape phenomenon manifested within days to two weeks of initiating ACEi therapy.<sup>4</sup> We believe few patients would have initiated an ACEi within days to two weeks

before surgery because of prior concerns in the literature about the use of ACEi in the perioperative setting.

We agree with the authors that large trials should inform the treatment effects of perioperative medications. Until such a trial occurs, we believe that—based on data from the VISION Study—physicians should consider withholding ACEi and ARB medications in patients undergoing noncardiac surgery.

### Competing Interests

Dr. Roshanov declares no competing interests. Dr. Devereaux declares grants from Roche-Diagnostics (Mannheim, Germany) and Abbott-Diagnostics (Abbott Park, Illinois) during the conduct of the study, and grants from Octopharma (Lachen, Switzerland), Philips Healthcare (Amsterdam, The Netherlands), Stryker (Hamilton, Ontario, Canada), Covidien (Minneapolis, Minnesota), and Boehringer Ingelheim (Ingelheim am Rhein, Germany) outside the submitted work.

**Pavel S. Roshanov, M.D., M.Sc., P. J. Devereaux, M.D., Ph.D.** London Health Sciences Centre, London, Ontario, Canada, and McMaster University, Hamilton, Ontario, Canada (P.S.R.). roshanp@mcmaster.ca

### References

1. Roshanov PS, Rochwerf B, Patel A, Salehian O, Duceppe E, Belley-Côté EP, Guyatt GH, Sessler DI, Le Manach Y, Borges FK, Tandon V, Worster A, Thompson A, Koshy M, Devereaux B, Spencer FA, Sanders RD, Sloan EN, Morley EE, Paul J, Raymer KE, Punthakee Z, Devereaux PJ: Withholding versus continuing angiotensin-converting enzyme inhibitors or angiotensin II receptor blockers before noncardiac surgery: An analysis of the vascular events in noncardiac surgery patients cohort evaluation prospective cohort. *ANESTHESIOLOGY* 2017; 126:16–27
2. ONTARGET Investigators; Yusuf S, Teo KK, Pogue J, Dyal L, Copland I, Schumacher H, Dagenais G, Sleight P, Anderson C: Telmisartan, ramipril, or both in patients at high risk for vascular events. *N Engl J Med* 2008; 358:1547–59
3. Twersky RS, Goel V, Narayan P, Weedon J: The risk of hypertension after preoperative discontinuation of angiotensin-converting enzyme inhibitors or angiotensin receptor antagonists in ambulatory and same-day admission patients. *Anesth Analg* 2014; 118:938–44
4. Meiracker AH van den, Man in 't Veld AJ, Admiraal PJ, Ritsema van Eck HJ, Boomsma F, Derckx FH, Schalekamp MA: Partial escape of angiotensin converting enzyme (ACE) inhibition during prolonged ACE inhibitor treatment: Does it exist and does it affect the antihypertensive response? *J Hypertens* 1992; 10:803–12

(Accepted for publication June 13, 2017.)

## The Isolated Forearm Paradox: Why Never a Response to Command in the Completely Unparalyzed?

### To the Editor:

Sanders *et al.*<sup>1</sup> have carefully performed an international study by a distinguished consortium that I am sure was not
